# Supplementary material for: Activated T cells exhibit increased uptake of silicon phthalocyanine Pc 4 and increased susceptibility to Pc 4-photodynamic therapy-mediated cell death
Source: Royal Society of Chemistry journal article supplement (doi:10.1039/c6pp00058d), 2016-04-27
Supplement: c6pp00058d1.pdf [file c6pp00058d1.pdf]

### **S1 Cutaneous T Cell Lymphoma T cell uptake of Pc 4**

To determine if a “naturally activated” T cell population also incorporated more Pc 4, we isolated T cells from either CTCL patients or healthy subjects and incubated them with 0, 50, 100 and 150 nM Pc 4 (A). Activated or resting T cells were then assessed for monomeric Pc 4 incorporation by flow cytometry and the median uptake values of Pc 4 MFI for CTCL patients versus healthy control volunteers was calculated (B).
